# Supplementary material for: Pharmacodynamics of Oral Cholecalciferol in Healthy Individuals with Vitamin D Deficiency: A Randomized Open-Label Study
Source: MDPI journal article supplement (doi:10.3390/nu13072293), 2021-07-02
Supplement: s1 [file s1]

### Supplementary Material Tables 1-3.

**Supplementary Material Table 3.** BMI median, interquartile range (IQR) and minimum and maximum values of the enrolled individuals at baseline.

| Baseline                 |                         | Total population<br>(n=75)    | Group A<br>(n=25)             | Group B<br>(n=25)             | Group C<br>(n=25)             |
|--------------------------|-------------------------|-------------------------------|-------------------------------|-------------------------------|-------------------------------|
| BMI (Kg/M <sup>2</sup> ) | Median [IQR]<br>Min-max | 22.82<br>21.22-24.6<br>19-28  | 23.01<br>21.49-26.02<br>19-28 | 22.78<br>21.84-24.79<br>20-27 | 21.67<br>20.37-24.37<br>19-28 |
| Males                    | Median [IQR]<br>Min-max | 23.51<br>21.2-26.24<br>19-28  | 23.7<br>22.9-27.77<br>20-28   | 23.59<br>21.8-25.88<br>20-27  | 21.3<br>18.67-23.67<br>19-28  |
| Females                  | Median [IQR]<br>Min-max | 22.35<br>20.95-24.29<br>19-27 | 22.59<br>20.10-23.82<br>19-27 | 22.43<br>21.78-24.38<br>20-27 | 22.04<br>20.59-25.17<br>19-27 |

**Supplementary Material Table 2.** Absolute levels of biochemical parameters at baseline and at the various time points.

| Time                                    |                                   | ALL subjects<br>(n=73)                           | Group A<br>(n=24)                                 | Group B<br>(n=25)                                  | Group C<br>(n=24)                                  | ANOVA<br>p-value |
|-----------------------------------------|-----------------------------------|--------------------------------------------------|---------------------------------------------------|----------------------------------------------------|----------------------------------------------------|------------------|
| <b>1,25-dihydroxyvitamin D (pg/mL)</b>  |                                   |                                                  |                                                   |                                                    |                                                    |                  |
| Baseline                                | N<br>Mean (SD)<br>Median<br>(IQR) | 73<br>44 (11.5)<br>43.7 (36.5-50.2)<br>16.8-77.1 | 24<br>42 (8.8)<br>43.5 (36.5-49.2)<br>24.4-58.4   | 25<br>47.2 (12.7)<br>45.4 (38.2-54.8)<br>28.2-77.1 | 24<br>42.8 (12.3)<br>40.5 (35.9-48.1)<br>16.8-65.5 | 0.234            |
| Day 28                                  | N<br>Mean (SD)<br>Median<br>(IQR) | 73<br>57 (15.4)<br>56.6 (44.3-63.3)<br>33.8-110  | 24<br>61.6 (16.9)<br>59.9 (48.5-71.7)<br>37.4-110 | 25<br>57.5 (14.6)<br>57.3 (45.9-61.7)<br>36.1-95.2 | 24<br>52 (13.5)<br>50 (42.4-60)<br>33.8-85.7       | 0.091            |
| Day 56                                  | N<br>Mean (SD)<br>Median<br>(IQR) | 73<br>56.8 (11.7)<br>54.5 (50.6-63.7)<br>23.7-97 | 24<br>59.2 (9.3)<br>57.2 (52.8-64.4)<br>44.4-81.4 | 25<br>56.6 (12.1)<br>53.8 (49-57.7)<br>42.6-97     | 24<br>54.5 (13.2)<br>53.5 (46.2-63.3)<br>23.7-79.7 | 0.387            |
| Day 84                                  | N<br>Mean (SD)<br>Median<br>(IQR) | 72<br>56.3 (13.1)<br>55.4 (47-65.2)<br>28.3-96.6 | 24<br>55.8 (13)<br>53.5 (46.8-64.7)<br>32.1-83.9  | 24<br>57.5 (14.4)<br>56.5 (47-64.9)<br>28.3-96.6   | 24<br>55.6 (12.1)<br>53.5 (46.7-66.7)<br>37.4-74.9 | 0.859            |
| Day 112                                 | N<br>Mean (SD)<br>Median<br>(IQR) | 69<br>48.2 (13.4)<br>46.2 (39-55)<br>24-104      | 24<br>47.2 (11.1)<br>47.7 (41.2-55.2)<br>24-63.4  | 23<br>51.6 (17.2)<br>48.4 (39.7-62.4)<br>25.2-104  | 22<br>45.7 (10.7)<br>44.1 (39.2-48.5)<br>25.3-70.3 | 0.314            |
| <b>24,25-dihydroxyvitamin D (ng/mL)</b> |                                   |                                                  |                                                   |                                                    |                                                    |                  |
| Baseline                                | N<br>Mean (SD)                    | 73<br>93.9 (185.1)                               | 24<br>98 (169)                                    | 25<br>105.6 (257.2)                                | 24<br>77.7 (95.9)                                  | 0.866            |

|                                 |                                   |                                                    |                                                     |                                                    |                                                    |       |
|---------------------------------|-----------------------------------|----------------------------------------------------|-----------------------------------------------------|----------------------------------------------------|----------------------------------------------------|-------|
|                                 | Median<br>(IQR)                   | 33.2 (16-90.1)<br>4.9-1308                         | 31.5 (17.5-96.1)<br>9.9-817.6                       | 29.4 (12.1-89.5)<br>4.9-1308                       | 39.7 (17.2-84.7)<br>5.7-361.6                      |       |
| Day 28                          | N<br>Mean (SD)<br>Median<br>(IQR) | 73<br>68.7 (152.8)<br>24.6 (16.8-53.5)<br>5.4-1077 | 24<br>77.4 (153.7)<br>24.4 (17.8-54.3)<br>8-760.7   | 25<br>80.4 (211.1)<br>24.6 (15.8-50.7)<br>5.5-1077 | 24<br>47.8 (48.4)<br>25 (18.9-63.8)<br>5.4-168.7   | 0.72  |
| Day 56                          | N<br>Mean (SD)<br>Median<br>(IQR) | 73<br>50.5 (76.1)<br>28.5 (11.2-59.8)<br>0-574.2   | 24<br>72.4 (115.4)<br>37.8 (15.7-77.3)<br>6.6-574.2 | 25<br>43 (50.6)<br>23.1 (10.6-50)<br>0-184.4       | 24<br>36.6 (36.8)<br>22 (10.3-51)<br>7.5-133.5     | 0.22  |
| Day 84                          | N<br>Mean (SD)<br>Median<br>(IQR) | 72<br>67.3 (170.3)<br>23.8 (13.8-56.2)<br>4-1399   | 24<br>58.3 (65.6)<br>32.2 (16.2-71.5)<br>9.7-268.1  | 24<br>98 (282.9)<br>21.8 (11.8-55)<br>5.4-1399     | 24<br>45.5 (60.3)<br>23.8 (13.1-52.5)<br>4-263     | 0.544 |
| Day 112                         | N<br>Mean (SD)<br>Median<br>(IQR) | 69<br>53 (108.8)<br>20.9 (13.5-44.1)<br>3.6-814    | 24<br>45.6 (57.7)<br>27.1 (14.3-46.3)<br>3.6-266.7  | 23<br>66 (169)<br>19.1 (9.8-33.6)<br>3.8-814       | 22<br>47.5 (67)<br>20.8 (16.5-44.7)<br>5.4-305.2   | 0.786 |
| <b>PTH (pg/mL)</b>              |                                   |                                                    |                                                     |                                                    |                                                    |       |
| Baseline                        | N<br>Mean (SD)<br>Median<br>(IQR) | 73<br>36.4 (14)<br>33.4 (25.9-43.1)<br>11.5-79.3   | 24<br>37.2 (15.4)<br>32.8 (25.6-43.1)<br>14.9-74.4  | 25<br>33.1 (10.5)<br>32.8 (25.5-40.9)<br>11.5-59.2 | 24<br>39.1 (15.7)<br>36 (27.2-48)<br>12.8-79.3     | 0.319 |
| Day 28                          | N<br>Mean (SD)<br>Median<br>(IQR) | 73<br>31.7 (11.6)<br>30.8 (23.3-39.8)<br>8.3-67.8  | 24<br>31.6 (10.4)<br>33.1 (25.4-38.2)<br>13.5-56.8  | 25<br>30.5 (11.3)<br>29.4 (23.3-39.8)<br>8.3-51.5  | 24<br>32.9 (13.3)<br>31.8 (23.9-42.1)<br>13-67.8   | 0.772 |
| Day 56                          | N<br>Mean (SD)<br>Median<br>(IQR) | 73<br>32.4 (14.5)<br>28.5 (23.6-37.9)<br>7.6-72.2  | 24<br>31.3 (13.6)<br>27.9 (23.5-34.6)<br>15.4-62.4  | 25<br>32.2 (13.1)<br>32.1 (25-39.5)<br>7.6-62.1    | 24<br>33.7 (17)<br>26.9 (22.5-38.7)<br>13.7-72.2   | 0.84  |
| Day 84                          | N<br>Mean (SD)<br>Median<br>(IQR) | 72<br>31.6 (12.6)<br>30.1 (23.2-37.1)<br>7.2-78.6  | 24<br>32.6 (11.9)<br>28.4 (25.3-37.5)<br>14-60.9    | 24<br>28 (11.3)<br>27.5 (20.8-34.4)<br>7.2-56.9    | 24<br>34.1 (14.2)<br>31.3 (27.7-38.2)<br>13.3-78.6 | 0.221 |
| Day 112*                        | N<br>Mean (SD)<br>Median<br>(IQR) | 69<br>34 (13)<br>31.1 (25.7-42.1)<br>9.2-73.1      | 24<br>34.9 (12.5)<br>29.9 (26.7-45.5)<br>18.4-63.2  | 23<br>32.3 (9.9)<br>32.5 (27-36.3)<br>10.2-50      | 22<br>34.8 (16.4)<br>30.4 (23.9-41.7)<br>9.2-73.1  | 0.753 |
| <b>Ionized calcium (mmol/L)</b> |                                   |                                                    |                                                     |                                                    |                                                    |       |
| Baseline                        | N<br>Mean (SD)<br>Median<br>(IQR) | 73<br>1.2 (0)<br>1.2 (1.2-1.2)<br>1.2-1.3          | 24<br>1.2 (0)<br>1.2 (1.2-1.3)<br>1.2-1.3           | 25<br>1.2 (0)<br>1.2 (1.2-1.2)<br>1.2-1.3          | 24<br>1.2 (0)<br>1.2 (1.2-1.2)<br>1.2-1.3          | 0.208 |
| Day 28                          | N<br>Mean (SD)<br>Median          | 72<br>1.2 (0)                                      | 24<br>1.2 (0)                                       | 24<br>1.2 (0)                                      | 24<br>1.2 (0)                                      | 0.636 |

|                        |                                   |                                             |                                             |                                             |                                             |       |
|------------------------|-----------------------------------|---------------------------------------------|---------------------------------------------|---------------------------------------------|---------------------------------------------|-------|
|                        | (IQR)                             | 1.2 (1.2-1.2)<br>1-1.3                      | 1.2 (1.2-1.2)<br>1-1.3                      | 1.2 (1.2-1.2)<br>1.2-1.3                    | 1.2 (1.2-1.2)<br>1.2-1.3                    |       |
| Day 56                 | N<br>Mean (SD)<br>Median<br>(IQR) | 73<br>1.2 (0)<br>1.2 (1.2-1.3)<br>1.2-1.3   | 24<br>1.2 (0)<br>1.2 (1.2-1.3)<br>1.2-1.3   | 25<br>1.2 (0)<br>1.2 (1.2-1.3)<br>1.2-1.3   | 24<br>1.2 (0)<br>1.2 (1.2-1.3)<br>1.2-1.3   | 0.486 |
| Day 84                 | N<br>Mean (SD)<br>Median<br>(IQR) | 72<br>1.2 (0)<br>1.2 (1.2-1.2)<br>1.2-1.3   | 24<br>1.2 (0)<br>1.2 (1.2-1.2)<br>1.2-1.3   | 24<br>1.2 (0)<br>1.2 (1.2-1.2)<br>1.2-1.3   | 24<br>1.2 (0)<br>1.2 (1.2-1.2)<br>1.2-1.3   | 0.674 |
| Day 112                | N<br>Mean (SD)<br>Median<br>(IQR) | 69<br>1.2 (0)<br>1.2 (1.2-1.2)<br>1.1-1.3   | 24<br>1.2 (0)<br>1.2 (1.2-1.2)<br>1.2-1.3   | 23<br>1.2 (0)<br>1.2 (1.2-1.2)<br>1.2-1.3   | 22<br>1.2 (0)<br>1.2 (1.2-1.2)<br>1.1-1.3   | 0.373 |
| <b>FGF-23 (pmol/L)</b> |                                   |                                             |                                             |                                             |                                             |       |
| Baseline               | N<br>Mean (SD)<br>Median<br>(IQR) | 73<br>1 (1.6)<br>0.5 (0.3-1)<br>0-10.8      | 24<br>0.5 (0.4)<br>0.4 (0.2-0.8)<br>0-1.6   | 25<br>1.3 (2.2)<br>0.6 (0.3-1.1)<br>0-10.8  | 24<br>1.1 (1.4)<br>0.6 (0.3-1.1)<br>0-5.4   | 0.192 |
| Day 28                 | N<br>Mean (SD)<br>Median<br>(IQR) | 73<br>1.4 (2.8)<br>0.8 (0.4-1.4)<br>0-22.5  | 24<br>0.7 (0.6)<br>0.6 (0.4-0.8)<br>0-2.7   | 25<br>2.2 (4.4)<br>1.2 (0.4-1.7)<br>0-22.5  | 24<br>1.4 (1.8)<br>0.6 (0.4-1.5)<br>0-7.8   | 0.19  |
| Day 56                 | N<br>Mean (SD)<br>Median<br>(IQR) | 73<br>1.3 (1.6)<br>0.7 (0.3-1.4)<br>0-9.5   | 24<br>0.8 (0.9)<br>0.6 (0.3-1)<br>0-3.9     | 25<br>1.7 (2.2)<br>0.8 (0.5-2)<br>0-9.5     | 24<br>1.2 (1.4)<br>0.7 (0.4-1.5)<br>0.2-6.7 | 0.154 |
| Day 84                 | N<br>Mean (SD)<br>Median<br>(IQR) | 72<br>1.2 (1.4)<br>0.7 (0.3-1.3)<br>0-6.1   | 24<br>0.8 (0.9)<br>0.4 (0.3-1)<br>0-3.7     | 24<br>1.3 (1.4)<br>1 (0.2-1.6)<br>0-5.9     | 24<br>1.4 (1.6)<br>0.7 (0.5-1.3)<br>0-6.1   | 0.208 |
| Day 112                | N<br>Mean (SD)<br>Median<br>(IQR) | 69<br>1.3 (1.9)<br>0.8 (0.4-1.2)<br>0.1-12  | 24<br>0.7 (0.5)<br>0.6 (0.3-1)<br>0.1-2.1   | 23<br>1.7 (2.6)<br>1 (0.4-1.8)<br>0.2-12    | 22<br>1.6 (1.8)<br>0.8 (0.6-2)<br>0.1-7.8   | 0.155 |
| <b>CTX-I (ng/mL)</b>   |                                   |                                             |                                             |                                             |                                             |       |
| Baseline               | N<br>Mean (SD)<br>Median<br>(IQR) | 73<br>0.4 (0.2)<br>0.3 (0.2-0.5)<br>0.1-0.9 | 24<br>0.4 (0.2)<br>0.4 (0.3-0.5)<br>0.1-0.9 | 25<br>0.3 (0.2)<br>0.3 (0.2-0.4)<br>0.1-0.8 | 24<br>0.3 (0.1)<br>0.4 (0.3-0.4)<br>0.1-0.5 | 0.022 |
| Day 28                 | N<br>Mean (SD)<br>Median<br>(IQR) | 73<br>0.4 (0.2)<br>0.4 (0.3-0.5)<br>0.1-1.1 | 24<br>0.4 (0.2)<br>0.4 (0.3-0.6)<br>0.1-1.1 | 25<br>0.3 (0.1)<br>0.3 (0.2-0.4)<br>0.1-0.7 | 24<br>0.4 (0.2)<br>0.4 (0.3-0.5)<br>0.1-0.7 | 0.07  |
| Day 56                 | N<br>Mean (SD)<br>Median          | 73<br>0.3 (0.2)<br>0.3 (0.2-0.5)<br>0-0.7   | 24<br>0.4 (0.2)<br>0.4 (0.2-0.6)<br>0.1-0.7 | 25<br>0.3 (0.1)<br>0.2 (0.2-0.4)<br>0.1-0.6 | 24<br>0.3 (0.1)<br>0.3 (0.2-0.4)<br>0-0.5   | 0.042 |

|                     |                                   |                                                     |                                                      |                                                     |                                                     |       |
|---------------------|-----------------------------------|-----------------------------------------------------|------------------------------------------------------|-----------------------------------------------------|-----------------------------------------------------|-------|
|                     | (IQR)                             |                                                     |                                                      |                                                     |                                                     |       |
| Day 84              | N<br>Mean (SD)<br>Median<br>(IQR) | 72<br>0.4 (0.2)<br>0.3 (0.2-0.5)<br>0-0.8           | 24<br>0.4 (0.2)<br>0.4 (0.3-0.5)<br>0.2-0.8          | 24<br>0.3 (0.2)<br>0.3 (0.2-0.4)<br>0.1-0.8         | 24<br>0.3 (0.2)<br>0.3 (0.2-0.5)<br>0-0.7           | 0.068 |
| Day 112             | N<br>Mean (SD)<br>Median<br>(IQR) | 69<br>0.3 (0.2)<br>0.3 (0.2-0.4)<br>0-0.8           | 24<br>0.4 (0.2)<br>0.4 (0.2-0.5)<br>0.1-0.8          | 23<br>0.3 (0.2)<br>0.3 (0.2-0.4)<br>0.1-0.6         | 22<br>0.3 (0.2)<br>0.3 (0.2-0.4)<br>0-0.6           | 0.09  |
| <b>P1NP (ng/mL)</b> |                                   |                                                     |                                                      |                                                     |                                                     |       |
| Baseline            | N<br>Mean (SD)<br>Median<br>(IQR) | 73<br>62.6 (24.1)<br>58 (45.9-72.2)<br>22.7-149.8   | 24<br>75.9 (29)<br>68.2 (57.9-90.9)<br>22.7-149.8    | 25<br>53.8 (18.7)<br>50.5 (42.5-57.1)<br>28.6-128.1 | 24<br>58.6 (18.2)<br>58.3 (43.5-71.4)<br>32.9-88.9  | 0.003 |
| Day 28              | N<br>Mean (SD)<br>Median<br>(IQR) | 73<br>64.8 (25.4)<br>60.4 (49.6-70)<br>25.1-153.6   | 24<br>80.5 (33.7)<br>67.3 (57.7-102.9)<br>25.1-153.6 | 25<br>55.9 (15.5)<br>54.4 (47.9-61.3)<br>28.6-103.3 | 24<br>58.4 (15.4)<br>60.1 (46-68.7)<br>32.8-92.5    | 0.001 |
| Day 56              | N<br>Mean (SD)<br>Median<br>(IQR) | 73<br>61.8 (22.4)<br>56.4 (46.5-75.4)<br>23.5-145.9 | 24<br>71.5 (28)<br>61.9 (53.5-82.2)<br>23.5-145.9    | 25<br>54.2 (16.3)<br>49.8 (45.3-61.8)<br>32.6-104.6 | 24<br>60.1 (18.8)<br>56.5 (44.1-75.6)<br>29.5-99.2  | 0.021 |
| Day 84              | N<br>Mean (SD)<br>Median<br>(IQR) | 72<br>60.3 (25.7)<br>56.4 (41.9-70.7)<br>25.3-195.7 | 24<br>72.6 (34.2)<br>66.2 (53.1-87.3)<br>27.3-195.7  | 24<br>50.8 (18)<br>46.1 (37.8-63.1)<br>25.3-87.6    | 24<br>57.4 (16.7)<br>55.9 (42.3-67.3)<br>33.9-88.2  | 0.009 |
| Day 112             | N<br>Mean (SD)<br>Median<br>(IQR) | 69<br>57.3 (20.7)<br>55.9 (42-66.7)<br>23.6-109.5   | 24<br>67.2 (23.2)<br>61.8 (53.7-81.9)<br>23.6-107.4  | 23<br>50.4 (16.1)<br>48.4 (41-55.2)<br>27.8-100     | 22<br>53.8 (18.8)<br>51.7 (37.9-65.5)<br>29.5-109.5 | 0.012 |
| <b>BALP (ug/L)</b>  |                                   |                                                     |                                                      |                                                     |                                                     |       |
| Baseline            | N<br>Mean (SD)<br>Median<br>(IQR) | 73<br>15.6 (6.7)<br>13.9 (11.1-18.3)<br>5.8-40.7    | 24<br>18 (8.5)<br>16.4 (12.5-20.8)<br>7.3-40.7       | 25<br>13.8 (3.9)<br>12.8 (11.1-15.6)<br>7.5-24.7    | 24<br>15.2 (6.6)<br>14.2 (10.4-18.3)<br>5.8-33.5    | 0.08  |
| Day 28              | N<br>Mean (SD)<br>Median<br>(IQR) | 73<br>15.1 (5.9)<br>14.2 (11.2-17.4)<br>3.3-34.5    | 24<br>17.2 (6.2)<br>16.6 (12.6-20.8)<br>6.7-33.2     | 25<br>13.7 (4.1)<br>12.9 (10.8-15.7)<br>8.7-24.2    | 24<br>14.5 (6.7)<br>14 (10.3-16.5)<br>3.3-34.5      | 0.093 |
| Day 56              | N<br>Mean (SD)<br>Median<br>(IQR) | 73<br>14.8 (6.7)<br>13.6 (10.8-16.8)<br>5.6-44.6    | 24<br>17.1 (8.1)<br>15.3 (12.3-18.5)<br>6-44.6       | 25<br>13.1 (4)<br>12.7 (10.1-14.8)<br>6.3-20.7      | 24<br>14.5 (7)<br>13.4 (10.6-15.8)<br>5.6-33.8      | 0.105 |
| Day 84              | N<br>Mean (SD)<br>Median          | 72<br>14.5 (6.4)<br>13.2 (10.6-15.9)<br>5.7-37.6    | 24<br>17.2 (7.6)<br>15.3 (12.2-22)<br>5.7-37.6       | 24<br>12.3 (3.6)<br>11.3 (10.3-14.4)<br>7.3-21.1    | 24<br>14 (6.5)<br>13.3 (11-14.2)<br>6.2-36.5        | 0.027 |

|                            |                                   |                                                   |                                                   |                                                   |                                                   |       |
|----------------------------|-----------------------------------|---------------------------------------------------|---------------------------------------------------|---------------------------------------------------|---------------------------------------------------|-------|
|                            | (IQR)                             |                                                   |                                                   |                                                   |                                                   |       |
| Day 112                    | N<br>Mean (SD)<br>Median<br>(IQR) | 69<br>13.8 (6.2)<br>12.4 (10.1-16.8)<br>4.2-43    | 24<br>16.1 (8.1)<br>13.8 (10.3-19.5)<br>6-43      | 23<br>12.1 (3.5)<br>11.2 (9.4-13.9)<br>7-20.9     | 22<br>13.1 (5.4)<br>12.4 (10-15.5)<br>4.2-27.9    | 0.065 |
| <b>Dkk-1 (pmol/L)</b>      |                                   |                                                   |                                                   |                                                   |                                                   |       |
| Baseline                   | N<br>Mean (SD)<br>Median<br>(IQR) | 73<br>18.6 (11.1)<br>15.7 (10.6-23.1)<br>2.2-56   | 24<br>16.7 (8.3)<br>17.3 (11.9-23.2)<br>2.2-32.6  | 25<br>17.7 (12.6)<br>13.7 (10.3-21)<br>4-50.3     | 24<br>21.2 (11.9)<br>18.6 (13.3-26.4)<br>6.1-56   | 0.339 |
| Day 28                     | N<br>Mean (SD)<br>Median<br>(IQR) | 73<br>19.1 (11.2)<br>16 (10.7-23.6)<br>4-60.8     | 24<br>18 (8.6)<br>16 (12.2-23.4)<br>5.6-39.9      | 25<br>17.5 (11)<br>15.3 (9.7-20.6)<br>4-44.4      | 24<br>21.9 (13.3)<br>18.1 (12.5-27.7)<br>7-60.8   | 0.329 |
| Day 56                     | N<br>Mean (SD)<br>Median<br>(IQR) | 73<br>22.7 (12.1)<br>21.1 (13.8-31.6)<br>5-64.5   | 24<br>21.3 (10.1)<br>21.6 (12.6-27.5)<br>5-37.5   | 25<br>21.5 (12.1)<br>16.6 (11.4-31.6)<br>5.6-45.5 | 24<br>25.4 (13.8)<br>22.4 (14.7-32.4)<br>8.7-64.5 | 0.421 |
| Day 84                     | N<br>Mean (SD)<br>Median<br>(IQR) | 72<br>24.8 (14.2)<br>21.7 (12.7-34.5)<br>4.5-63.6 | 24<br>23.7 (13.1)<br>20.2 (13.7-31.8)<br>6-53     | 24<br>24.7 (14.3)<br>22.3 (11.9-35)<br>6.3-53.3   | 24<br>25.9 (15.5)<br>22.6 (14.3-35.4)<br>4.5-63.6 | 0.873 |
| Day 112                    | N<br>Mean (SD)<br>Median<br>(IQR) | 69<br>23.9 (12.7)<br>21.6 (14.1-31.4)<br>5-54.5   | 24<br>21.8 (11.7)<br>21.4 (11.8-30.1)<br>5.3-45.4 | 23<br>23.3 (13.2)<br>21.6 (13-30.2)<br>5-51.9     | 22<br>26.7 (13.1)<br>22.1 (18.2-33.1)<br>9.9-54.5 | 0.419 |
| <b>Sclerostin (pmol/L)</b> |                                   |                                                   |                                                   |                                                   |                                                   |       |
| Baseline                   | N<br>Mean (SD)<br>Median<br>(IQR) | 73<br>25 (25.5)<br>18.9 (11.9-31.7)<br>4.1-173    | 24<br>20.5 (13.7)<br>16.8 (11.8-24.4)<br>4.1-66.2 | 25<br>28.2 (27)<br>19.5 (11.9-36.4)<br>5.8-139.1  | 24<br>26.1 (32.5)<br>19.2 (15.5-25.1)<br>5-173    | 0.559 |
| Day 28                     | N<br>Mean (SD)<br>Median<br>(IQR) | 73<br>22.3 (20.6)<br>17.9 (11.6-25.7)<br>0-151.8  | 24<br>18.1 (13.1)<br>16.6 (9.1-22.9)<br>0-57.9    | 25<br>22.7 (15.9)<br>17.9 (13.8-28.6)<br>0-82.2   | 24<br>26 (29.3)<br>19.2 (14.7-25.5)<br>0-151.8    | 0.419 |
| Day 56                     | N<br>Mean (SD)<br>Median<br>(IQR) | 73<br>25.2 (22)<br>20.5 (14.2-31.7)<br>0-150      | 24<br>20.1 (15.2)<br>19.7 (11.1-25.9)<br>0-63.3   | 25<br>27.3 (20.6)<br>24.9 (15-33.9)<br>6.2-106.8  | 24<br>28.1 (28.2)<br>20 (15.9-32.7)<br>7.8-150    | 0.382 |
| Day 84                     | N<br>Mean (SD)<br>Median<br>(IQR) | 72<br>24 (17.9)<br>19 (13.3-28.3)<br>0-111.1      | 24<br>20.9 (13.2)<br>18.4 (11.2-26.7)<br>4.5-52.5 | 24<br>27 (18.7)<br>20.9 (14.9-34.8)<br>5.2-89.9   | 24<br>24.1 (21.1)<br>19.7 (13.2-25.5)<br>0-111.1  | 0.504 |
| Day 112                    | N<br>Mean (SD)<br>Median          | 69<br>25.6 (16.8)<br>20.3 (14-33.4)<br>6.2-98     | 24<br>24.1 (13.9)<br>19 (16.4-32.5)<br>7.6-57.7   | 23<br>28 (20.7)<br>19.7 (13.8-33.9)<br>6.2-98     | 22<br>24.5 (15.6)<br>22 (13.6-28.7)<br>8.1-76     | 0.691 |

|  |       |  |  |  |  |  |
|--|-------|--|--|--|--|--|
|  | (IQR) |  |  |  |  |  |
|--|-------|--|--|--|--|--|

**Supplementary Material Table 3.** Percentage change of the tested biochemical parameters with respect to baseline at the various time points.

| Time                                               |                                                     | ALL subjects<br>(n=73)                                          | Group A<br>(n=24)                                              | Group B<br>(n=25)                                                    | Group C<br>(n=24)                                              |                                                                                          | ANOVA<br>Results                                            |
|----------------------------------------------------|-----------------------------------------------------|-----------------------------------------------------------------|----------------------------------------------------------------|----------------------------------------------------------------------|----------------------------------------------------------------|------------------------------------------------------------------------------------------|-------------------------------------------------------------|
| <b>1,25-dihydroxyvitamin D</b>                     |                                                     |                                                                 |                                                                |                                                                      |                                                                |                                                                                          |                                                             |
| Day 28 percentage change with respect to Baseline  | N<br>Mean (SD)<br>95%CI<br>p-value#<br>Median (IQR) | 73<br>34 (35)<br>25.8;42.2<br><0.001<br>33 (11.4;49.8)          | 24<br>50 (38.3)<br>33.8;66.1<br><0.001<br>40.7 (25.4;76.1)     | 25<br>25.8 (29.5)<br>13.6;38<br><0.001<br>28.6 (6.4;44.3)            | 24<br>26.6 (32.7)<br>12.7;40.4<br>0.001<br>19.5 (8.9;41)       | P anova<br>P AvsB<br>P AvsC<br>P BvsC<br>P AvsB (Holm)<br>P AvsC (Holm)<br>P BvsC (Holm) | 0.022<br>0.014<br>0.019<br>0.941<br>0.043<br>0.043<br>0.941 |
| Day 56 percentage change with respect to Baseline  | N<br>Mean (SD)<br>95%CI<br>p-value#<br>Median (IQR) | 73<br>34.1 (30.8)<br>26.9;41.2<br><0.001<br>35.1 (11.6;49)      | 24<br>45.3 (29.1)<br>33;57.6<br><0.001<br>41.5 (26.3;51.4)     | 25<br>25.2 (29.8)<br>12.9;37.5<br><0.001<br>23.1 (0;42.1)            | 24<br>32.1 (31.2)<br>18.9;45.3<br><0.001<br>26 (10.5;51)       | P anova<br>P AvsB<br>P AvsC<br>P BvsC<br>P AvsB (Holm)<br>P AvsC (Holm)<br>P BvsC (Holm) | 0.067<br>0.022<br>0.133<br>0.425<br>0.067<br>0.267<br>0.425 |
| Day 84 percentage change with respect to Baseline  | N<br>Mean (SD)<br>95%CI<br>p-value#<br>Median (IQR) | 72<br>31.5 (29.5)<br>24.6;38.4<br><0.001<br>30.9 (7.4;44.2)     | 24<br>34.2 (22.6)<br>24.7;43.8<br><0.001<br>32.7 (18.6;42.9)   | 24<br>23.7 (29)<br>11.4;35.9<br>0.001<br>22 (2.8;38.7)               | 24<br>36.6 (35)<br>21.8;51.4<br><0.001<br>32.3 (13.3;63.6)     | P anova<br>P AvsB<br>P AvsC<br>P BvsC<br>P AvsB (Holm)<br>P AvsC (Holm)<br>P BvsC (Holm) | 0.273<br>0.218<br>0.776<br>0.131<br>0.435<br>0.776<br>0.392 |
| Day 112 percentage change with respect to Baseline | N<br>Mean (SD)<br>95%CI<br>p-value#<br>Median (IQR) | 69<br>13.1 (26.2)<br>6.8;19.4<br><0.001<br>10 (-6.4;27.9)       | 24<br>14.4 (26.4)<br>3.2;25.5<br>0.014<br>11.2 (3.2;22)        | 23<br>11.1 (28.9)<br>-1.5;23.6<br>0.08<br>3.3 (-8.8;31.6)            | 22<br>13.9 (24.2)<br>3.2;24.7<br>0.013<br>8.1 (-6.1;29.5)      | P anova<br>P AvsB<br>P AvsC<br>P BvsC<br>P AvsB (Holm)<br>P AvsC (Holm)<br>P BvsC (Holm) | 0.9<br>0.672<br>0.959<br>0.717<br>1<br>1<br>1               |
| <b>24,25-dihydroxyvitamin D</b>                    |                                                     |                                                                 |                                                                |                                                                      |                                                                |                                                                                          |                                                             |
| Day 28 percentage change with respect to Baseline  | N<br>Mean (SD)<br>95%CI<br>p-value#<br>Median (IQR) | 73<br>11.6 (134.8)<br>-19.9;43.1<br>0.464<br>-17.7 (-49.5;27.2) | 24<br>-4.7 (49.5)<br>-25.6;16.2<br>0.645<br>-11.3 (-33.7;27.7) | 25<br>46.6 (213.1)<br>-41.4;134.5<br>0.285<br>-9.6 (-50.8;65.7)<br>- | 24<br>-8.5 (70.8)<br>-38.4;21.4<br>0.562<br>-25.1 (-49.9;15.1) | P anova<br>P AvsB<br>P AvsC<br>P BvsC<br>P AvsB (Holm)<br>P AvsC (Holm)<br>P BvsC (Holm) | 0.281<br>0.186<br>0.922<br>0.156<br>0.467<br>0.922<br>0.467 |

|                                                    |                                                     |                                                                 |                                                                  |                                                                  |                                                                 |                                                                                          |                                                             |
|----------------------------------------------------|-----------------------------------------------------|-----------------------------------------------------------------|------------------------------------------------------------------|------------------------------------------------------------------|-----------------------------------------------------------------|------------------------------------------------------------------------------------------|-------------------------------------------------------------|
| Day 56 percentage change with respect to Baseline  | N<br>Mean (SD)<br>95%CI<br>p-value#<br>Median (IQR) | 73<br>-0.8 (83)<br>-20.2;18.6<br>0.935<br>-25.3 (-57.7;29.5)    | 24<br>13.9 (93)<br>-25.3;53.2<br>0.47<br>-23.6 (-46.3;41.5)<br>- | 25<br>9.2 (93.7)<br>-29.5;47.8<br>0.629<br>-13.2 (-53.4;47.8)    | 24<br>-25.9 (52.5)<br>-48.1;-3.7<br>0.024<br>-37.4 (-61.8;4.1)  | P anova<br>P AvsB<br>P AvsC<br>P BvsC<br>P AvsB (Holm)<br>P AvsC (Holm)<br>P BvsC (Holm) | 0.192<br>0.839<br>0.098<br>0.14<br>0.839<br>0.293<br>0.293  |
| Day 84 percentage change with respect to Baseline  | N<br>Mean (SD)<br>95%CI<br>p-value#<br>Median (IQR) | 72<br>1.4 (91)<br>-20;22.8<br>0.898<br>-17.6 (-63.8;29.7)       | 24<br>15.6 (116)<br>-33.4;64.6<br>0.517<br>2.7 (-62.3;29.7)      | 24<br>-0.1 (68.1)<br>-28.9;28.7<br>0.995<br>-11.3 (-52.8;40.5)   | 24<br>-11.4 (84.1)<br>-46.9;24.1<br>0.515<br>-32.4 (-66.1;18.3) | P anova<br>P AvsB<br>P AvsC<br>P BvsC<br>P AvsB (Holm)<br>P AvsC (Holm)<br>P BvsC (Holm) | 0.595<br>0.555<br>0.312<br>0.671<br>1<br>0.935<br>1         |
| Day 112 percentage change with respect to Baseline | N<br>Mean (SD)<br>95%CI<br>p-value#<br>Median (IQR) | 69<br>-1.2 (112.1)<br>-28.1;25.7<br>0.929<br>-29.3 (-61.9;21.1) | 24<br>-9.9 (73.9)<br>-41.1;21.3<br>0.519<br>-27.3 (-69.7;17.9)   | 23<br>26.1 (172.1)<br>-48.4;100.5<br>0.475<br>-42.6 (-57.9;54.8) | 22<br>-20.2 (49.2)<br>-42.1;1.6<br>0.067<br>-25.1 (-60.5;11.8)  | P anova<br>P AvsB<br>P AvsC<br>P BvsC<br>P AvsB (Holm)<br>P AvsC (Holm)<br>P BvsC (Holm) | 0.348<br>0.275<br>0.755<br>0.17<br>0.551<br>0.755<br>0.511  |
| <b>PTH</b>                                         |                                                     |                                                                 |                                                                  |                                                                  |                                                                 |                                                                                          |                                                             |
| Day 28 percentage change with respect to Baseline  | N<br>Mean (SD)<br>95%CI<br>p-value#<br>Median (IQR) | 73<br>-7.7 (35.2)<br>-15.9;0.5<br>0.065<br>-14.4 (-34.2;9.4)    | 24<br>-6.6 (40.8)<br>-23.8;10.7<br>0.438<br>-13.7 (-35.3;11.5)   | 25<br>-5 (33.9)<br>-19;9.1<br>0.473<br>-12.3 (-27.2;15.9)        | 24<br>-11.8 (31.2)<br>-24.9;1.4<br>0.078<br>-20 (-32.4;0)       | P anova<br>P AvsB<br>P AvsC<br>P BvsC<br>P AvsB (Holm)<br>P AvsC (Holm)<br>P BvsC (Holm) | 0.785<br>0.873<br>0.615<br>0.505<br>1<br>1<br>1             |
| Day 56 percentage change with respect to Baseline  | N<br>Mean (SD)<br>95%CI<br>p-value#<br>Median (IQR) | 73<br>-7.1 (35.9)<br>-15.5;1.3<br>0.097<br>-15.2 (-27.6;6.6)    | 24<br>-9.4 (41.5)<br>-26.9;8.1<br>0.279<br>-20.4 (-29.1;3.2)     | 25<br>-0.1 (37.8)<br>-15.7;15.6<br>0.994<br>-7.9 (-21.4;7.6)     | 24<br>-12 (27.2)<br>-23.5;-0.6<br>0.04<br>-15.5 (-34.3;3.3)     | P anova<br>P AvsB<br>P AvsC<br>P BvsC<br>P AvsB (Holm)<br>P AvsC (Holm)<br>P BvsC (Holm) | 0.476<br>0.368<br>0.799<br>0.249<br>0.746<br>0.799<br>0.746 |
| Day 84 percentage change with respect to Baseline  | N<br>Mean (SD)<br>95%CI<br>p-value#<br>Median (IQR) | 72<br>-8.3 (31.2)<br>-15.6;-1<br>0.026<br>-10.5 (-38;14.9)      | 24<br>-6.5 (28.5)<br>-18.5;5.5<br>0.275<br>-8.6 (-25.4;12.2)     | 24<br>-11.9 (31.6)<br>-25.2;1.4<br>0.078<br>-10.7 (-38;8)        | 24<br>-6.6 (34.2)<br>-21;7.9<br>0.356<br>-10.5 (-40.1;17.2)     | P anova<br>P AvsB<br>P AvsC<br>P BvsC<br>P AvsB (Holm)<br>P AvsC (Holm)<br>P BvsC (Holm) | 0.793<br>0.554<br>0.994<br>0.559<br>1<br>1<br>1             |
| Day 112 percentage change with respect to Baseline | N<br>Mean (SD)<br>95%CI<br>p-value#<br>Median (IQR) | 69<br>1.2 (38.8)<br>-8.2;10.5<br>0.804<br>-6.4 (-23.7;15.5)     | 24<br>3.9 (44.5)<br>-14.9;22.7<br>0.673<br>-3 (-27.3;21.8)       | 23<br>0.9 (25.3)<br>-10.1;11.8<br>0.87<br>-11.2 (-21.6;17.1)     | 22<br>-1.5 (44.9)<br>-21.4;18.4<br>0.877<br>-6.6 (-23.2;11.3)   | P anova<br>P AvsB<br>P AvsC<br>P BvsC<br>P AvsB (Holm)<br>P AvsC (Holm)<br>P BvsC (Holm) | 0.897<br>0.794<br>0.644<br>0.84<br>1<br>1<br>1              |
| <b>Ionized calcium</b>                             |                                                     |                                                                 |                                                                  |                                                                  |                                                                 |                                                                                          |                                                             |
| Day 28 percentage change with respect to Baseline  | N<br>Mean (SD)<br>95%CI<br>p-value#<br>Median (IQR) | 72<br>-0.7 (3.2)<br>-1.5;0<br>0.048<br>-0.8 (-2.4;0.8)          | 24<br>-1.7 (3.8)<br>-3.3;-0.1<br>0.036<br>-1.2 (-3.2;0)          | 24<br>-0.2 (3.2)<br>-1.5;1.2<br>0.793<br>-0.4 (-2.6;1.1)         | 24<br>-0.4 (2.3)<br>-1.3;0.6<br>0.433<br>-0.8 (-1.7;0.8)        | P anova<br>P AvsB<br>P AvsC<br>P BvsC<br>P AvsB (Holm)<br>P AvsC (Holm)<br>P BvsC (Holm) | 0.189<br>0.094<br>0.144<br>0.825<br>0.281<br>0.287<br>0.825 |

|                                                    |              |                    |                    |                    |                    |               |       |
|----------------------------------------------------|--------------|--------------------|--------------------|--------------------|--------------------|---------------|-------|
| Day 56 percentage change with respect to Baseline  | N            | 73                 | 24                 | 25                 | 24                 | P anova       | 0.71  |
|                                                    | Mean (SD)    | 0.8 (2.8)          | 0.4 (2.9)          | 0.8 (2.8)          | 1.1 (2.8)          | P AvsB        | 0.573 |
|                                                    | 95%CI        | 0.1;1.4            | -0.8;1.6           | -0.3;2             | -0.1;2.2           | P AvsC        | 0.421 |
|                                                    | p-value#     | 0.022              | 0.51               | 0.14               | 0.08               | P BvsC        | 0.802 |
|                                                    | Median (IQR) | 0.9 (-1.6;2.5)     | 0.4 (-1.2;2.4)     | 0.8 (-0.8;2.4)     | 2.4 (-1.6;3.3)     | P AvsB (Holm) | 1     |
|                                                    |              |                    | -5.6;5.9           | -4;8.6             | -3.2;6             | P AvsC (Holm) | 1     |
|                                                    |              |                    |                    |                    |                    | P BvsC (Holm) | 1     |
| Day 84 percentage change with respect to Baseline  | N            | 72                 | 24                 | 24                 | 24                 | P anova       | 0.359 |
|                                                    | Mean (SD)    | -0.1 (2.6)         | -0.4 (2.1)         | 0.5 (2.7)          | -0.4 (2.9)         | P AvsB        | 0.22  |
|                                                    | 95%CI        | -0.7;0.5           | -1.3;0.5           | -0.6;1.7           | -1.7;0.8           | P AvsC        | 0.983 |
|                                                    | p-value#     | 0.717              | 0.335              | 0.363              | 0.479              | P BvsC        | 0.212 |
|                                                    | Median (IQR) | -0.4 (-1.6;1.7)    | -0.8 (-1.6;1.6)    | 0 (-0.8;1.9)       | -0.8 (-1.8;0.4)    | P AvsB (Holm) | 0.635 |
|                                                    |              |                    |                    |                    |                    | P AvsC (Holm) | 0.983 |
|                                                    |              |                    |                    |                    |                    | P BvsC (Holm) | 0.635 |
| Day 112 percentage change with respect to Baseline | N            | 69                 | 24                 | 23                 | 22                 | P anova       | 0.775 |
|                                                    | Mean (SD)    | -0.9 (2.5)         | -1.2 (2.5)         | -0.7 (2.3)         | -0.7 (2.7)         | P AvsB        | 0.533 |
|                                                    | 95%CI        | -1.5;-0.3          | -2.2;-0.1          | -1.7;0.3           | -1.9;0.5           | P AvsC        | 0.546 |
|                                                    | p-value#     | 0.005              | 0.032              | 0.152              | 0.234              | P BvsC        | 0.99  |
|                                                    | Median (IQR) | -0.8 (-2.5;0.8)    | -1.2 (-3.1;0.8)    | -0.8 (-2.4;0.8)    | 0 (-2.5;0.6)       | P AvsB (Holm) | 1     |
|                                                    |              |                    |                    |                    |                    | P AvsC (Holm) | 1     |
|                                                    |              |                    |                    |                    |                    | P BvsC (Holm) | 1     |
| FGF-23                                             |              |                    |                    |                    |                    |               |       |
| Day 28 percentage change with respect to Baseline  | N            | 69                 | 23                 | 24                 | 22                 | P anova       | 0.835 |
|                                                    | Mean (SD)    | 104.3 (241.4)      | 93.1 (190.6)       | 91.4 (174.9)       | 130.1 (340.7)      | P AvsB        | 0.981 |
|                                                    | 95%CI        | 46.3;162.3         | 10.7;175.5         | 17.5;165.2         | -20.9;281.2        | P AvsC        | 0.613 |
|                                                    | p-value#     | 0.001              | 0.029              | 0.018              | 0.088              | P BvsC        | 0.592 |
|                                                    | Median (IQR) | 40.6 (-6.5;87.4)   | 26.7 (-31.9;118.2) | 59.1 (10.1;92.5)   | 34.3 (-5.6;73.2)   | P AvsB (Holm) | 1     |
|                                                    |              |                    |                    |                    |                    | P AvsC (Holm) | 1     |
|                                                    |              |                    |                    |                    |                    | P BvsC (Holm) | 1     |
| Day 56 percentage change with respect to Baseline  | N            | 69                 | 23                 | 24                 | 22                 | P anova       | 0.682 |
|                                                    | Mean (SD)    | 121.5 (322.4)      | 140.4 (289.1)      | 74.9 (140.6)       | 152.5 (472.8)      | P AvsB        | 0.492 |
|                                                    | 95%CI        | 44;198.9           | 15.4;265.5         | 15.5;134.3         | -57.2;362.1        | P AvsC        | 0.902 |
|                                                    | p-value#     | 0.003              | 0.029              | 0.016              | 0.145              | P BvsC        | 0.422 |
|                                                    | Median (IQR) | 27.3 (-30.8;142.9) | 44.2 (-33.3;198.8) | 17.9 (-16.8;123.1) | 30.4 (-24.7;109.4) | P AvsB (Holm) | 1     |
|                                                    |              |                    |                    |                    |                    | P AvsC (Holm) | 1     |
|                                                    |              |                    |                    |                    |                    | P BvsC (Holm) | 1     |
| Day 84 percentage change with respect to Baseline  | N            | 68                 | 23                 | 23                 | 22                 | P anova       | 0.267 |
|                                                    | Mean (SD)    | 90.6 (238.2)       | 156 (366.9)        | 49.5 (123.5)       | 65.3 (129.6)       | P AvsB        | 0.132 |
|                                                    | 95%CI        | 32.9;148.3         | -2.7;314.6         | -3.9;102.9         | 7.8;122.7          | P AvsC        | 0.204 |
|                                                    | p-value#     | 0.003              | 0.054              | 0.068              | 0.028              | P BvsC        | 0.824 |
|                                                    | Median (IQR) | 19.1 (-29.9;107.2) | 17.9 (-36.5;149.9) | -1.7 (-42;100.2)   | 59.1 (-8.7;84.6)   | P AvsB (Holm) | 0.397 |
|                                                    |              |                    |                    |                    |                    | P AvsC (Holm) | 0.407 |
|                                                    |              |                    |                    |                    |                    | P BvsC (Holm) | 0.824 |
| Day 112 percentage change with respect to Baseline | N            | 66                 | 23                 | 22                 | 21                 | P anova       | 0.18  |
|                                                    | Mean (SD)    | 164 (554.5)        | 114.8 (220.4)      | 43.4 (72.5)        | 344.2 (942.1)      | P AvsB        | 0.664 |
|                                                    | 95%CI        | 27.7;300.3         | 19.4;210.1         | 11.2;75.5          | -84.6;773          | P AvsC        | 0.17  |
|                                                    | p-value#     | 0.019              | 0.021              | 0.011              | 0.11               | P BvsC        | 0.077 |
|                                                    | Median (IQR) | 50 (-8.5;108.5)    | 58.8 (-10.8;185)   | 42.6 (0.4;64)      | 50 (-21.9;137.7)   | P AvsB (Holm) | 0.664 |
|                                                    |              |                    |                    |                    |                    | P AvsC (Holm) | 0.341 |
|                                                    |              |                    |                    |                    |                    | P BvsC (Holm) | 0.23  |
| CTX-I                                              |              |                    |                    |                    |                    |               |       |
| Day 28 percentage change with respect to Baseline  | N            | 73                 | 24                 | 25                 | 24                 | P anova       | 0.746 |
|                                                    | Mean (SD)    | 12.8 (38.1)        | 8 (32.7)           | 16.3 (46.3)        | 14 (34.9)          | P AvsB        | 0.458 |
|                                                    | 95%CI        | 3.9;21.7           | -5.7;21.8          | -2.8;35.3          | -0.7;28.7          | P AvsC        | 0.594 |
|                                                    | p-value#     | 0.005              | 0.24               | 0.092              | 0.061              | P BvsC        | 0.839 |
|                                                    | Median (IQR) | 8.6 (-5.9;25)      | 10.1 (-7.9;30)     | 8.6 (-4.4;24.1)    | 8 (-5.7;25.4)      | P AvsB (Holm) | 1     |
|                                                    |              |                    |                    |                    | -35;150            | P AvsC (Holm) | 1     |
|                                                    |              |                    |                    |                    |                    | P BvsC (Holm) | 1     |



|                                                    |              |                   |                  |                   |                   |               |       |
|----------------------------------------------------|--------------|-------------------|------------------|-------------------|-------------------|---------------|-------|
| Day 56 percentage change with respect to Baseline  | N            | 73                | 24               | 25                | 24                | P anova       | 0.611 |
|                                                    | Mean (SD)    | 1.6 (48.7)        | -3.5 (33.2)      | 9.5 (61.7)        | -1.5 (47.4)       | P AvsB        | 0.359 |
|                                                    | 95%CI        | -9.7;13           | -17.5;10.5       | -16;34.9          | -21.5;18.6        | P AvsC        | 0.887 |
|                                                    | p-value#     | 0.778             | 0.613            | 0.451             | 0.881             | P BvsC        | 0.439 |
|                                                    | Median (IQR) | -5.6 (-27.5;16.7) | 4.3 (-21.6;9.9)  | 0 (-27.7;43.3)    | -15.8 (-30.5;6.7) | P AvsB (Holm) | 1     |
|                                                    |              |                   |                  |                   |                   | P AvsC (Holm) | 1     |
|                                                    |              |                   |                  |                   |                   | P BvsC (Holm) | 1     |
| Day 84 percentage change with respect to Baseline  | N            | 72                | 24               | 24                | 24                | P anova       | 0.636 |
|                                                    | Mean (SD)    | 5.7 (40)          | 4 (28.4)         | 11.9 (54.5)       | 1.3 (33.2)        | P AvsB        | 0.496 |
|                                                    | 95%CI        | -3.7;15.1         | -8;16            | -11.1;35          | -12.8;15.3        | P AvsC        | 0.816 |
|                                                    | p-value#     | 0.229             | 0.5              | 0.294             | 0.855             | P BvsC        | 0.362 |
|                                                    | Median (IQR) | 0 (-20.1;25)      | 4.5 (-6.7;23.9)  | -4.5 (-24.6;28.8) | 0 (-22.4;10.6)    | P AvsB (Holm) | 1     |
|                                                    |              |                   |                  |                   |                   | P AvsC (Holm) | 1     |
|                                                    |              |                   |                  |                   |                   | P BvsC (Holm) | 1     |
| Day 112 percentage change with respect to Baseline | N            | 69                | 24               | 23                | 22                | P anova       | 0.714 |
|                                                    | Mean (SD)    | 1.5 (53.1)        | -2.2 (34.4)      | 9 (58.1)          | -2.4 (64.7)       | P AvsB        | 0.477 |
|                                                    | 95%CI        | -11.3;14.2        | -16.7;12.3       | -16.1;34.1        | -31.1;26.3        | P AvsC        | 0.99  |
|                                                    | p-value#     | 0.817             | 0.759            | 0.466             | 0.865             | P BvsC        | 0.479 |
|                                                    | Median (IQR) | -7.3 (-32.5;17.6) | -2.9 (-23.3;18)  | -2.6 (-32.4;23.2) | -17.6 (-38;0)     | P AvsB (Holm) | 1     |
|                                                    |              |                   |                  |                   |                   | P AvsC (Holm) | 1     |
|                                                    |              |                   |                  |                   |                   | P BvsC (Holm) | 1     |
| <b>P1NP</b>                                        |              |                   |                  |                   |                   |               |       |
| Day 28 percentage change with respect to Baseline  | N            | 73                | 24               | 25                | 24                | P anova       | 0.624 |
|                                                    | Mean (SD)    | 4.9 (17.2)        | 6.7 (20.2)       | 5.8 (15.2)        | 2.1 (16.1)        | P AvsB        | 0.855 |
|                                                    | 95%CI        | 0.9;8.9           | -1.9;15.2        | -0.5;12           | -4.7;8.9          | P AvsC        | 0.362 |
|                                                    | p-value#     | 0.018             | 0.12             | 0.069             | 0.531             | P BvsC        | 0.459 |
|                                                    | Median (IQR) | 3 (-8.3;15.2)     | 3.8 (-2.6;14.6)  | 3 (-5.5;16.5)     | 2.6 (-10.8;9.5)   | P AvsB (Holm) | 1     |
|                                                    |              |                   |                  |                   |                   | P AvsC (Holm) | 1     |
|                                                    |              |                   |                  |                   |                   | P BvsC (Holm) | 1     |
| Day 56 percentage change with respect to Baseline  | N            | 73                | 24               | 25                | 24                | P anova       | 0.313 |
|                                                    | Mean (SD)    | 1 (18.4)          | -3.6 (20.3)      | 2.5 (15.6)        | 4.2 (19)          | P AvsB        | 0.253 |
|                                                    | 95%CI        | -3.3;5.3          | -12.2;5          | -4;8.9            | -3.9;12.2         | P AvsC        | 0.148 |
|                                                    | p-value#     | 0.638             | 0.394            | 0.439             | 0.296             | P BvsC        | 0.747 |
|                                                    | Median (IQR) | -1.1 (-11;14.5)   | -7.8 (-15.7;8.5) | 0.8 (-9.3;15.2)   | 7.1 (-8.2;15.4)   | P AvsB (Holm) | 0.506 |
|                                                    |              |                   |                  |                   |                   | P AvsC (Holm) | 0.445 |
|                                                    |              |                   |                  |                   |                   | P BvsC (Holm) | 0.747 |
| Day 84 percentage change with respect to Baseline  | N            | 72                | 24               | 24                | 24                | P anova       | 0.556 |
|                                                    | Mean (SD)    | -2.4 (20.5)       | -3 (21.8)        | -5.3 (19)         | 1.1 (20.9)        | P AvsB        | 0.703 |
|                                                    | 95%CI        | -7.2;2.4          | -12.2;6.2        | -13.3;2.8         | -7.7;9.9          | P AvsC        | 0.493 |
|                                                    | p-value#     | 0.324             | 0.506            | 0.187             | 0.799             | P BvsC        | 0.287 |
|                                                    | Median (IQR) | -3.8 (-14.7;11.3) | -5.6 (-14.6;7.9) | -7.5 (-19.9;10.8) | -0.5 (-8.4;21.1)  | P AvsB (Holm) | 0.985 |
|                                                    |              |                   |                  |                   |                   | P AvsC (Holm) | 0.985 |
|                                                    |              |                   |                  |                   |                   | P BvsC (Holm) | 0.86  |
| Day 112 percentage change with respect to Baseline | N            | 69                | 24               | 23                | 22                | P anova       | 0.769 |
|                                                    | Mean (SD)    | -7.1 (18)         | -9.2 (16)        | -6.3 (14.1)       | -5.6 (23.5)       | P AvsB        | 0.576 |
|                                                    | 95%CI        | -11.4;-2.8        | -16;-2.5         | -12.3;-0.2        | -16;4.8           | P AvsC        | 0.503 |
|                                                    | p-value#     | 0.002             | 0.01             | 0.044             | 0.275             | P BvsC        | 0.908 |
|                                                    | Median (IQR) | -8.6 (-17.6;3.5)  | -8.7 (-20.3;4.1) | -8.6 (-14.4;3)    | -8.8 (-17;3.5)    | P AvsB (Holm) | 1     |
|                                                    |              |                   |                  |                   |                   | P AvsC (Holm) | 1     |
|                                                    |              |                   |                  |                   |                   | P BvsC (Holm) | 1     |
| <b>BALP</b>                                        |              |                   |                  |                   |                   |               |       |
| Day 28 percentage change with respect to Baseline  | N            | 73                | 24               | 25                | 24                | P anova       | 0.494 |
|                                                    | Mean (SD)    | -1.8 (15.6)       | -0.4 (15.9)      | -0.1 (12.1)       | -4.9 (18.5)       | P AvsB        | 0.951 |
|                                                    | 95%CI        | -5.4;1.9          | -7.1;6.3         | -5.1;4.9          | -12.7;2.9         | P AvsC        | 0.321 |
|                                                    | p-value#     | 0.333             | 0.905            | 0.962             | 0.207             | P BvsC        | 0.288 |
|                                                    | Median (IQR) | -1.7 (-10.7;7.9)  | -1.3 (-8.2;7.6)  | -2.8 (-8.9;8.1)   | -6.7 (-15.4;5.3)  | P AvsB (Holm) | 0.951 |
|                                                    |              |                   |                  |                   |                   | P AvsC (Holm) | 0.865 |
|                                                    |              |                   |                  |                   |                   | P BvsC (Holm) | 0.865 |

|                                                    |                                                     |                                                                  |                                                               |                                                                |                                                              |                                                                                          |                                                             |
|----------------------------------------------------|-----------------------------------------------------|------------------------------------------------------------------|---------------------------------------------------------------|----------------------------------------------------------------|--------------------------------------------------------------|------------------------------------------------------------------------------------------|-------------------------------------------------------------|
| Day 56 percentage change with respect to Baseline  | N<br>Mean (SD)<br>95%CI<br>p-value#<br>Median (IQR) | 73<br>-4.4 (14.5)<br>-7.8;-1<br>0.011<br>-2.4 (-15.4;5.2)        | 24<br>-3.5 (16.7)<br>-10.5;3.5<br>0.316<br>-7.7 (-15.4;9)     | 25<br>-5.1 (13.5)<br>-10.7;0.5<br>0.073<br>-2.4 (-8.9;3)       | 24<br>-4.7 (13.8)<br>-10.5;1.1<br>0.109<br>-0.2 (-14;5.2)    | P anova<br>P AvsB<br>P AvsC<br>P BvsC<br>P AvsB (Holm)<br>P AvsC (Holm)<br>P BvsC (Holm) | 0.926<br>0.707<br>0.779<br>0.927<br>1<br>1<br>1             |
| Day 84 percentage change with respect to Baseline  | N<br>Mean (SD)<br>95%CI<br>p-value#<br>Median (IQR) | 72<br>-6.5 (16.7)<br>-10.4;-2.6<br>0.001<br>-6.8 (-17.9;5.5)     | 24<br>-2.5 (18.2)<br>-10.2;5.2<br>0.503<br>-2.2 (-16.1;9.9)   | 24<br>-10.1 (15.2)<br>-16.5;-3.6<br>0.004<br>-8.5 (-23.6;-3.6) | 24<br>-6.9 (16.3)<br>-13.8;0<br>0.049<br>-11.1 (-17.1;5.5)   | P anova<br>P AvsB<br>P AvsC<br>P BvsC<br>P AvsB (Holm)<br>P AvsC (Holm)<br>P BvsC (Holm) | 0.296<br>0.122<br>0.365<br>0.514<br>0.365<br>0.731<br>0.731 |
| Day 112 percentage change with respect to Baseline | N<br>Mean (SD)<br>95%CI<br>p-value#<br>Median (IQR) | 69<br>-10.0 (16.4)<br>-14.5;-6.6<br><0.001<br>-10.6 (-22.4;-1.1) | 24<br>-9.4 (15.9)<br>-16.1;-2.6<br>0.008<br>-8.3 (-21.8;-0.2) | 23<br>-11.5 (17.5)<br>-19;-3.9<br>0.005<br>-13 (-22.8;-3.3)    | 22<br>-11 (16.5)<br>-18.3;-3.7<br>0.005<br>-10 (-20.6;-1.3)  | P anova<br>P AvsB<br>P AvsC<br>P BvsC<br>P AvsB (Holm)<br>P AvsC (Holm)<br>P BvsC (Holm) | 0.903<br>0.668<br>0.743<br>0.924<br>1<br>1<br>1             |
| <b>Dkk-1</b>                                       |                                                     |                                                                  |                                                               |                                                                |                                                              |                                                                                          |                                                             |
| Day 28 percentage change with respect to Baseline  | N<br>Mean (SD)<br>95%CI<br>p-value#<br>Median (IQR) | 73<br>15.6 (66.9)<br>0;31.2<br>0.05<br>-0.3 (-16.3;20.7)         | 24<br>28.9 (97.3)<br>-12.2;70<br>0.159<br>9.1 (-8.1;42.4)     | 25<br>11 (48.7)<br>-9.2;31.1<br>0.272<br>-4.4 (-16.5;18.8)     | 24<br>7.1 (42.1)<br>-10.6;24.9<br>0.416<br>-4.5 (-22.3;21.2) | P anova<br>P AvsB<br>P AvsC<br>P BvsC<br>P AvsB (Holm)<br>P AvsC (Holm)<br>P BvsC (Holm) | 0.489<br>0.352<br>0.265<br>0.842<br>0.794<br>0.794<br>0.842 |
| Day 56 percentage change with respect to Baseline  | N<br>Mean (SD)<br>95%CI<br>p-value#<br>Median (IQR) | 73<br>41.2 (76.4)<br>23.4;59.1<br><0.001<br>21.7 (-3.3;60.8)     | 24<br>51.5 (104)<br>7.6;95.4<br>0.024<br>34.6 (1.4;53.8)      | 25<br>39.3 (59.3)<br>14.8;63.7<br>0.003<br>20.5 (-9.6;95.6)    | 24<br>33.1 (60)<br>7.7;58.4<br>0.013<br>14.9 (-1;58.5)       | P anova<br>P AvsB<br>P AvsC<br>P BvsC<br>P AvsB (Holm)<br>P AvsC (Holm)<br>P BvsC (Holm) | 0.703<br>0.582<br>0.411<br>0.779<br>1<br>1<br>1             |
| Day 84 percentage change with respect to Baseline  | N<br>Mean (SD)<br>95%CI<br>p-value#<br>Median (IQR) | 72<br>48.1 (77.6)<br>29.9;66.3<br><0.001<br>18.5 (-2.5;80.7)     | 24<br>60.9 (94.3)<br>21.1;100.7<br>0.004<br>30.3 (2.9;81.2)   | 24<br>52.7 (73.2)<br>21.8;83.6<br>0.002<br>27.1 (0;86.7)       | 24<br>30.7 (62)<br>4.5;56.9<br>0.023<br>12.7 (-6.5;54.7)     | P anova<br>P AvsB<br>P AvsC<br>P BvsC<br>P AvsB (Holm)<br>P AvsC (Holm)<br>P BvsC (Holm) | 0.385<br>0.718<br>0.183<br>0.33<br>0.718<br>0.549<br>0.659  |
| Day 112 percentage change with respect to Baseline | N<br>Mean (SD)<br>95%CI<br>p-value#<br>Median (IQR) | 69<br>46.1 (73.5)<br>28.5;63.8<br><0.001<br>24.1 (-6;83.5)       | 24<br>51.2 (88)<br>14.1;88.4<br>0.009<br>17.8 (-5.3;93.8)     | 23<br>49.3 (72.2)<br>18.1;80.6<br>0.003<br>24.1 (0.3;78.2)     | 22<br>37.3 (58.6)<br>11.3;63.3<br>0.007<br>34.3 (-6.7;70.2)  | P anova<br>P AvsB<br>P AvsC<br>P BvsC<br>P AvsB (Holm)<br>P AvsC (Holm)<br>P BvsC (Holm) | 0.792<br>0.93<br>0.527<br>0.588<br>1<br>1<br>1              |
| <b>Sclerostin</b>                                  |                                                     |                                                                  |                                                               |                                                                |                                                              |                                                                                          |                                                             |
| Day 28 percentage change with respect to Baseline  | N<br>Mean (SD)<br>95%CI<br>p-value#<br>Median (IQR) | 73<br>-2.0 (47.6)<br>-13.0;9.0<br>0.715<br>-7.5 (-35.9;35.4)     | 25<br>-5.1 (49.0)<br>-25.3;15.1<br>0.608<br>-17 (-41.0;31.8)  | 24<br>-2.5 (40.8)<br>-23.2;18.5<br>0.809<br>-7.6 (-42.0;33.0)  | 24<br>1.64 (44.4)<br>-17.0;20.4<br>0.59<br>6.5 (-25.7;46.3)  | P anova<br>P AvsB<br>P AvsC<br>P BvsC<br>P AvsB (Holm)<br>P AvsC (Holm)<br>P BvsC (Holm) | 0.849<br>0.694<br>0.873<br>0.58<br>1<br>1<br>1              |

|                                                    |              |                    |                   |                  |                   |               |       |
|----------------------------------------------------|--------------|--------------------|-------------------|------------------|-------------------|---------------|-------|
|                                                    |              |                    |                   |                  |                   |               |       |
| Day 56 percentage change with respect to Baseline  | N            | 73                 | 24                | 25               | 24                | P anova       | 0.426 |
|                                                    | Mean (SD)    | 8 (46.5)           | -6.0 (52.3)       | 10.5 (35.47)     | 19.8 (48.7)       | P AvsB        | 0.872 |
|                                                    | 95%CI        | -13.1;9.0          | -28.5;15.7        | -4.1;25.2        | (-0.8;40.3)       | P AvsC        | 0.231 |
|                                                    | p-value#     | 0.146              | 0.550             | 0.150            | 0.059             | P BvsC        | 0.294 |
|                                                    | Median (IQR) | -7.65 (-37.7;37.0) | -6.0 (-42.1;45.0) | 2.1 (-13.4;35.3) | 8.52 (-19.7;67.4) | P AvsB (Holm) | 0.872 |
|                                                    |              |                    |                   |                  |                   | P AvsC (Holm) | 0.693 |
|                                                    |              |                    |                   |                  |                   | P BvsC (Holm) | 0.693 |
| Day 84 percentage change with respect to Baseline  | N            | 72                 | 24                | 24               | 24                | P anova       | 0.999 |
|                                                    | Mean (SD)    | 4.7 (49.7)         | -5.9 (49.4)       | 15.9 (9.8)       | 4.1 (53.1)        | P AvsB        | 0.963 |
|                                                    | 95%CI        | -3.0;20.4          | -14.9;26.8        | -4.27;36.2       | -18.3;26.5        | P AvsC        | 0.972 |
|                                                    | p-value#     | 0.143              | 0.560             | 0.116            | 0.706             | P BvsC        | 0.991 |
|                                                    | Median (IQR) | 2.5 (-32.2;50.0)   | 5.27 (-36.1;49.4) | 9.9 (-29.4;52.0) | -6.1 (-35.6;51.1) | P AvsB (Holm) | 1     |
|                                                    |              |                    |                   |                  |                   | P AvsC (Holm) | 1     |
|                                                    |              |                    |                   |                  |                   | P BvsC (Holm) | 1     |
| Day 112 percentage change with respect to Baseline | N            | 69                 | 24                | 23               | 22                | P anova       | 0.404 |
|                                                    | Mean (SD)    | 8.2 (35.8)         | 12.7 (36.2)       | 10.5 (38.1)      | 1.4 (33.4)        | P AvsB        | 0.212 |
|                                                    | 95%CI        | -0.02;16.4         | -2.21;27.7        | -5.2;26.2        | -12.4;15.2        | P AvsC        | 0.86  |
|                                                    | p-value#     | 0.051              | 0.091             | 0.18             | 0.836             | P BvsC        | 0.294 |
|                                                    | Median (IQR) | 10.8 (-21.2;33.3)  | 17.9 (-21.2;50.0) | 5.8 (-13.8;31.6) | 5.9 (-29.7;30.0)  | P AvsB (Holm) | 0.635 |
|                                                    |              |                    |                   |                  |                   | P AvsC (Holm) | 0.86  |
|                                                    |              |                    |                   |                  |                   | P BvsC (Holm) | 0.635 |

BALB = bone alkaline phosphatase; CTX-1 = C-terminal telopeptide of type I collagen; DKK-1 = Dickkopf-1; FGF-23 = fibroblast growth factor-23; IQR = interquartile range; P1NP = procollagen type I N-terminal propeptide; PTH = parathyroid hormone; SD = standard deviation  
The Holm–Bonferroni method was used to counteract the problem of multiple comparisons.
